# Supplementary material for: In Vitro Meiosis of Male Germline Stem Cells
Source: PubMed Central journal article supplement (PMC7664054; doi:10.1016/j.stemcr.2020.10.006), 2020-11-10
Supplement: mmc1.pdf [file mmc1.pdf]

**Stem Cell Reports, Volume 15**

**Supplemental Information**

***In Vitro* Meiosis of Male Germline Stem Cells**

**Qijing Lei, Xin Lai, Jitske Eliveld, Susana M. Chuva de Sousa Lopes, Ans M.M. van Pelt, and Geert Hamer**

## Supplemental Information

### In vitro meiosis of male germline stem cells

Qijing Lei<sup>1</sup>, Xin Lai<sup>1</sup>, Jitske Eliveld<sup>1</sup>, Susana M. Chuva de Sousa Lopes<sup>2</sup>, Ans M.M. van Pelt<sup>1</sup>, Geert Hamer<sup>1,\*</sup>

<sup>1</sup>Center for Reproductive Medicine, Reproductive Biology Laboratory, Amsterdam Reproduction and Development Research Institute, Amsterdam UMC, Location AMC, University of Amsterdam, 1105AZ, Amsterdam, the Netherlands

<sup>2</sup>Department of Anatomy and Embryology, Leiden University Medical Center, 2333 ZC, Leiden, Netherlands

\*Corresponding address. Center for Reproductive Medicine, Reproductive Biology Laboratory, Amsterdam UMC, Location AMC, Meibergdreef 9, 1105 AZ, Amsterdam, The Netherlands. E-mail: [g.hamer@amsterdamumc.nl](mailto:g.hamer@amsterdamumc.nl)

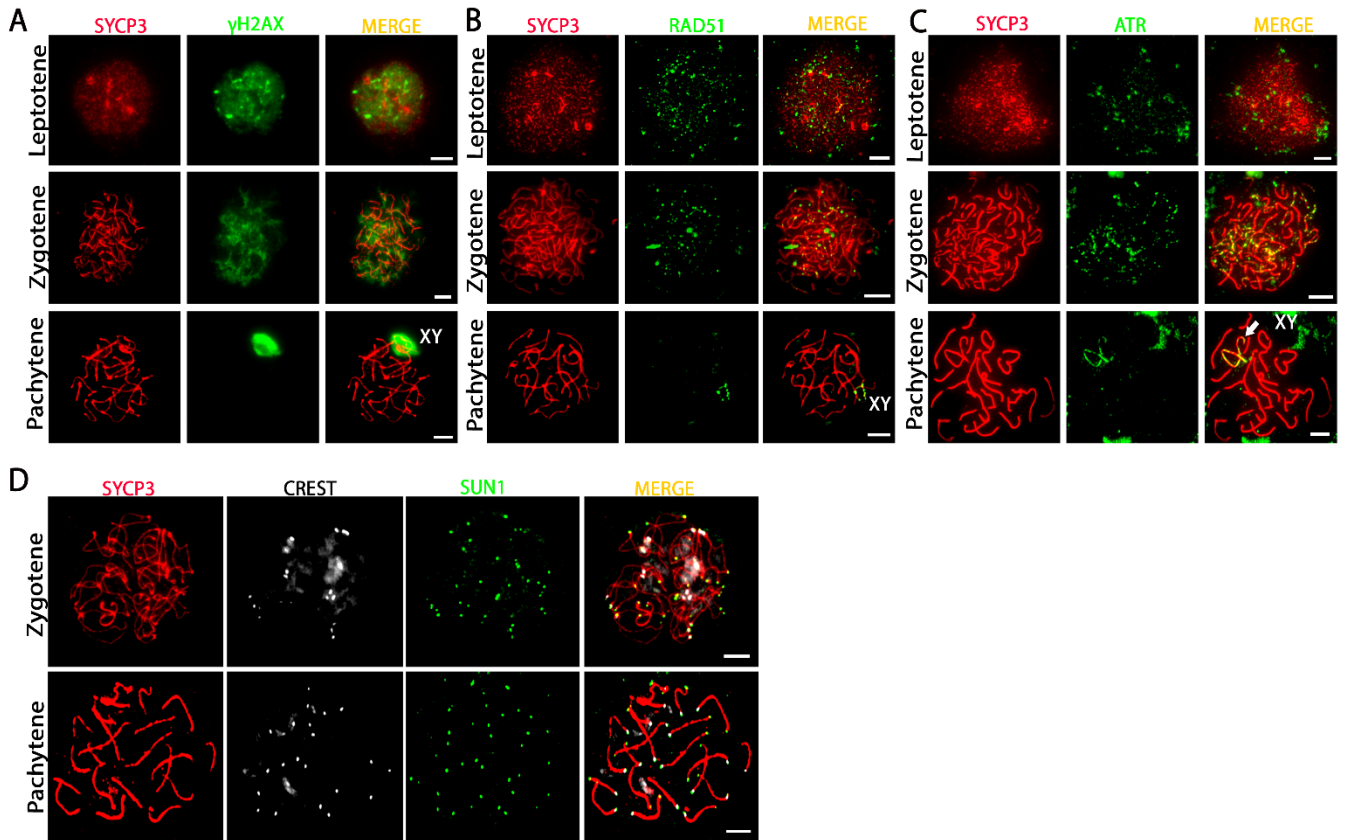

**Figure S1. Positive control experiments using mouse testicular cells.**

*In vivo* meiotic cells stained for SYCP3 (red) and **(A)**  $\gamma$ H2AX (green), **(B)** RAD51 (green), **(C)** ATR (green), **(D)** SUN1 (green) and centromeres (CREST, white). Scale bar, 5  $\mu$ m.

## Supplemental Experimental Procedures

| <b>Primary antibodies</b>   |                      |                               |             |              |
|-----------------------------|----------------------|-------------------------------|-------------|--------------|
| Target Protein              | Host                 | Source                        | Cat. Number | IHC Dilution |
| $\gamma$ -H2AX              | Mouse                | Merck Millipore               | 05-636      | 1:10,000     |
| SYCP3                       | Mouse                | Abcam                         | ab97672     | 1:600        |
| SYCP3                       | Rabbit               | NOVUS                         | NB300-231   | 1:2500       |
| CREST-serum                 | Human                | FitzGerald                    | 90C-CS1058  | 1:600        |
| ATR                         | Rabbit               | Cell Signaling Technology     | #2790       | 1:100        |
| $\alpha$ -Tubulin           | Mouse                | Sigma                         | T9026       | 1:200        |
| RAD51                       | Rabbit               | Thermo Fisher Scientific      | PA5-27195   | 1:100        |
| MLH1                        | Mouse                | BD Pharmingen                 | 550838      | 1:50         |
| SUN1                        | Guinea pig           | Provided by Manfred Alsheimer | N/A         | 1:600        |
| <b>Secondary antibodies</b> |                      |                               |             |              |
| Fluorescence                | Host                 | Source                        | Cat. Number | IHC Dilution |
| Alexa Fluor 488             | Donkey anti-Mouse    | Thermo Fisher Scientific      | A21202      | 1:1000       |
| Alexa Fluor 488             | Donkey anti-Rabbit   | Thermo Fisher Scientific      | A21206      | 1:1000       |
| Alexa Fluor 488             | Goat anti-Guinea pig | Thermo Fisher Scientific      | A11073      | 1:1000       |
| Alexa Fluor 555             | Goat anti-mouse      | Thermo Fisher Scientific      | A21424      | 1:1000       |
| Alexa Fluor 555             | Donkey anti-Rabbit   | Thermo Fisher Scientific      | A31572      | 1:1000       |
| Alexa Fluor 647             | Goat anti-Human      | Thermo Fisher Scientific      | A21445      | 1:1000       |

**Table S1. Antibodies used in this study. Related to Figures 1, 3, 4, 5 and S1.**

## Supplemental Experimental Procedures

### *GS cells and Sertoli cell line culture*

Mouse GS cells were cultured as previously reported (Kanatsu-Shinohara et al., 2003; Mulder et al., 2017; Zheng et al., 2017). After the third passage, the cells were cultured on mitotically inactivated mouse embryonic fibroblasts (MEFs; Gibco, A34962), using in a medium mainly composed of StemPro-34 SFM medium (Thermo Fisher Scientific), StemPro-34 Supplement (Thermo Fisher Scientific), 1% fetal bovine serum (FBS), recombinant human GDNF (10 ng/ml, 450-10, Peprotech), recombinant human bFGF (10 ng/ml, 100-18B, Peprotech), recombinant human EGF (20 ng/ml, AF-100-15, Peprotech), recombinant human LIF (10 ng/ml, CYT-644, Prospec), as well as other components as previously reported (Kanatsu-Shinohara et al., 2003). GS cells were refreshed every 2-3 days, dissociated by accutase (Thermo Fisher Scientific) and passaged every 5-7 days (doubling time, 3 days) at a ratio of 1:4-6 on fresh mitotically inactivated mouse embryonic fibroblasts. The cells were maintained at 37°C in 5% CO<sub>2</sub> in air. The cells used for this research were mostly at passage 20, with a maximum of 26 passages.

As a feeder cell, we used available Sertoli cell lines SK49 or TM4. SK49 was established by Walther et al., from 10-day-old male H-2Kb- tsA58 transgenic mice carrying an inducible temperature-sensitive SV40 T antigen (Walther et al., 1996). This cell line is able to express Sertoli cell-specific pattern markers and exhibit distinct Sertoli cell properties. TM4 was established by Matfier et al., from 11-13 days of age male BALB/c - nu/+ mice (Matfier, 1980). Both Sertoli cell lines were cultured at 37°C and 5% CO<sub>2</sub> in Dulbecco's Eagle's medium (DMEM; Thermo Fisher Scientific, Waltham, MA, USA) supplemented with 10% fetal bovine serum (FBS), penicillin (100 U/mL) and streptomycin (100 U/mL).

### *In vitro meiosis of GS cells*

SK49 cells or TM4 Sertoli cells, inactivated by mitomycin (10 µg/ml, M7949, Sigma), were grown on 12-well plates pre-coated with laminin (20 µg/ml, L2020, Sigma) to a density of 1 x 10<sup>5</sup>. Then GS cells were seeded on these Sertoli cells for two days to maintain GS cell proliferation as described previously (Kanatsu-Shinohara et al., 2003). To induce meiosis, day 0 to day 3 (Fig. 1A), the cells were cultured in a medium composed of StemPro-34 SFM medium and StemPro-34 Supplement, 10% KnockOut Serum Replacement (KSR), Retinoic acid (2 µM, R2625, sigma), Recombinant Mouse BMP-4 Protein (20 ng/ml, 5020-BP, R&D Systems), Recombinant Mouse Activin A Protein (100 ng/ml, 338-AC, R&D Systems). From day 3 to day 9 after meiosis induction, the medium was composed of StemPro-34 SFM medium and StemPro-34 Supplement, 10% KSR, Bovine Pituitary Extract (BPE) (50 µg/ml, 354123, Corning Life Sciences), Follicle-stimulating hormone (FSH) (200 ng/ml, F4021, Sigma), Testosterone (10 µM, 86500, Sigma) and refreshed daily.

### *Okadaic acid (OA)-induced generation of metaphase-like cells in vitro*

For generation of metaphase-like cells *in vitro*, cells were cultured in Dulbecco's modified Eagle's medium (DMEM) supplemented with 5% FBS, 3  $\mu$ M okadaic acid (OA; 459618, Millipore) at 34°C for 4 hours and fixed in 4% paraformaldehyde (PFA). For negative controls no OA was added.

### *Cytospins*

The cells were detached from the culture dish using 0.25% trypsin and washed with 1x phosphate buffered saline (PBS) and diluted in 200  $\mu$ L PBS/1% BSA containing 30,000 to 50,000 cells for each cytospin spot and spun for 7 minutes at 112g. The slides were air dried for 10min, fixed in 4% PFA and stored at 4°C in PBS or stored at -80°C after air drying.

### *Karyotyping*

The Cells were dissociated into single cell suspension after 8 days after spermatogonial differentiation, subjected to hypotonic treatment with 75 mM KCl at 37 °C for 10 minutes and fixed in freshly prepared methanol/acetic acid (ratio: 3:1). Cells were dropped onto glass slides from 1 m distance and air dried. Chromosomes were stained with Hoechst 33342.

### *Flow Cytometry*

For FACS analysis, after the cells were fixed and permeabilized in 70% Ethanol (EtOH). The cells were labeled with 1  $\mu$ g/ $1 \times 10^5$  cells propidium iodide (PI, Sigma, P4964) in FACS/EDTA buffer (1x PBS with 1% FCS/0.1% NaN<sub>3</sub>/2 mM EDTA) containing DNase-free RNase A (v/v 1:20) for 5 min. The measurements and sorting were performed on a Sony SH800Z cell Sorter (Sony Biotechnology Inc. Japan). Data was analyzed using FlowJo software version 10. For acrosome detection, the sorted "haploid" peak (putative 1C-region) cells were incubated with lectin peanut agglutinin (PNA) conjugated with Alexa Fluor 488 conjugate (1:700, L21409, Life Technologies) for 15min.

### Supplemental References:

- Kanatsu-Shinohara, M., Ogonuki, N., Inoue, K., Miki, H., Ogura, A., Toyokuni, S., and Shinohara, T. (2003). Long-term proliferation in culture and germline transmission of mouse male germline stem cells. *Biology of reproduction* 69, 612-616.
- Matfier, J.P. (1980). Establishment and characterization of two distinct mouse testicular epithelial cell lines. *Biology of reproduction* 23, 243-252.
- Mulder, C.L., Catsburg, L.A.E., Zheng, Y., de Winter-Korver, C.M., van Daalen, S.K.M., van Wely, M., Pals, S., Repping, S., and van Pelt, A.M.M. (2017). Long-term health in recipients of transplanted in vitro propagated spermatogonial stem cells. *Human reproduction* 33, 81-90.
- Walther, N., Jansen, M., Ergün, S., Kascheike, B., and Ivell, R. (1996). Sertoli Cell Lines Established fromH-2Kb-tsA58 Transgenic Mice Differentially Regulate the Expression of Cell-Specific Genes. *Experimental cell research* 225, 411-421.
- Zheng, Y., Jongejan, A., Mulder, C.L., Mastenbroek, S., Repping, S., Wang, Y., Li, J., and Hamer, G. (2017). Trivial role for NSMCE2 during in vitro proliferation and differentiation of male germline stem cells. *Reproduction* 154, 81-95.
